# Supplementary material
Source: PubMed Central journal article supplement (PMC3842027)
Supplement: NIHMS511227-supplement-supplementary.pdf [file NIHMS511227-supplement-supplementary.pdf]

## Supporting Information (SI)

**SI Table 1:** Body length and testes mass data for 43 elasmobranch species. Data was collected from published sources and unpublished data. When mean testes mass and body length data were not presented in published sources we extracted this information from figures using the program GraphClick ([www.arizona-software.ch/graphclick](http://www.arizona-software.ch/graphclick)). \* indicates species where raw data were provided by the authors.

| Latin name                                              | Body Length (cm) | Testes Mass (g) | Reference                                                               |
|---------------------------------------------------------|------------------|-----------------|-------------------------------------------------------------------------|
| <i>Apristurus brunneus</i>                              | 60.9             | 32.2            | Flammang et al. 2008                                                    |
| <i>Carcharhinus acronotus</i>                           | 110              | 41.9            | Sulikowski et al. 2007; Fischer et al. 2009                             |
| <i>Carcharhinus amblyrhynchos</i>                       | 142.8            | 170.0           | Stevens and McLoughlin 1991                                             |
| <i>Carcharhinus amblyrhyncooides</i>                    | 114.9            | 129.7           | Stevens and McLoughlin 1991                                             |
| <i>Carcharhinus amboinensis</i>                         | 215.7            | 486.5           | Stevens and McLoughlin 1991                                             |
| <i>Carcharhinus brevipinna</i>                          | 210.9            | 342.9           | Stevens and McLoughlin 1991                                             |
| <i>Carcharhinus cautus</i>                              | 85.0             | 53.2            | Fitzpatrick J.L., Kempster R., Collin S.P., Evans J.P. unpublished data |
| <i>Carcharhinus dussumieri</i>                          | 76.7             | 14.6            | Stevens and McLoughlin 1991                                             |
| <i>Carcharhinus falciformis</i>                         | 219.8            | 120.5           | Stevens and McLoughlin 1991                                             |
| <i>Carcharhinus macloti</i>                             | 78.6             | 19.2            | Stevens and McLoughlin 1991                                             |
| <i>Carcharhinus plumbeus</i><br>(Atlantic population)   | 160.8            | 364.8           | Baremore and Hale personal communication*                               |
| <i>Carcharhinus plumbeus</i><br>(Australian population) | 165.5            | 223.8           | Stevens and McLoughlin 1991                                             |
| <i>Carcharhinus tilstoni</i>                            | 74.0             | 35.5            | Fitzpatrick J.L., Kempster R., Collin S.P., Evans J.P. unpublished data |
| <i>Carcharias taurus</i>                                | 218.1            | 125             | Lucifora et al. 2002                                                    |
| <i>Carcharodon carcharias</i>                           | 385.2            | 6844.1          | Tanaka et al. 2011                                                      |
| <i>Cephaloscyllium umbratile</i>                        | 102.4            | 290.2           | Taniuchi 1988                                                           |
| <i>Chlamydoselachus anguineus</i>                       | 134.4            | 28.7            | Tanaka et al. 1990                                                      |
| <i>Cirrhigaleus asper</i>                               | 95.3             | 16.2            | Fischer et al. 2006*                                                    |
| <i>Dalatias licha</i>                                   | 89.3             | 10.5            | Bottaro et al. 2008                                                     |
| <i>Etmopterus pusillus</i>                              | 39.8             | 3.7             | Coelho and Erzini 2007                                                  |
| <i>Galeus eastmani</i>                                  | 35.3             | 1               | Horie and Tanaka 2000                                                   |
| <i>Galeus nipponensis</i>                               | 59.5             | 8.1             | Horie and Tanaka 2000                                                   |
| <i>Gollum attenuatus</i>                                | 86.6             | 31              | Yano 1993                                                               |
| <i>Hemigaleus microstoma</i>                            | 86.2             | 16.8            | Stevens and McLoughlin 1991                                             |
| <i>Hemipristis elongatus</i>                            | 128.5            | 22.4            | Stevens and McLoughlin 1991                                             |
| <i>Hexanchus nakamurai</i>                              | 84.0             | 21.9            | Fitzpatrick J.L., Kempster R., Collin S.P., Evans J.P. unpublished data |
| <i>Isurus oxyrinchus</i>                                | 228.3            | 200             | Joung and Hsu 2005                                                      |
| <i>Loxodon macrorhinus</i>                              | 72.7             | 21.9            | Stevens and McLoughlin 1991                                             |
| <i>Mustelus antarcticus</i>                             | 86.0             | 14.8            | Fitzpatrick J.L., Kempster R., Collin S.P., Evans J.P. unpublished data |
| <i>Mustelus canis</i>                                   | 96.5             | 23              | Zagaglia et al. 2011                                                    |
| <i>Mustelus sp.</i> (Manazo)                            | 69.6             | 17.6            | Stevens and McLoughlin 1991                                             |
| <i>Parmaturus xaniurus</i>                              | 45.8             | 19.5            | Flammang et al. 2008                                                    |
| <i>Prionace glauca</i>                                  | 243              | 490.5           | McClusky 2011                                                           |
| <i>Rhizoprionodon acutus</i>                            | 81.1             | 10.6            | Stevens and McLoughlin 1991                                             |
| <i>Rhizoprionodon lalandii</i>                          | 64.9             | 9.4             | Motta et al. 2007                                                       |
| <i>Rhizoprionodon taylori</i>                           | 47.0             | 6.2             | Stevens and McLoughlin 1991                                             |
| <i>Rhizoprionodon terraenovae</i>                       | 88.4             | 11.1            | Parsons personal communication*                                         |

|                                                    |       |      |                                                                            |
|----------------------------------------------------|-------|------|----------------------------------------------------------------------------|
| Scyliorhinus canicula                              | 40.98 | 9.1  | Kousteni et al. 2010                                                       |
| Sphyrna lewini                                     | 234.5 | 55.3 | Hazin et al. 2001                                                          |
| Sphyrna tiburo                                     | 82.2  | 8.1  | Parsons personal communication*                                            |
| Squalus acanthias<br>(British Columbia population) | 81.5  | 32.4 | Fitzpatrick J.L. unpublished data                                          |
| Squalus acanthias<br>(Crete population)            | 54.9  | 8.1  | Chatzisprou and Megalofonou 2005                                           |
| Squalus acanthias<br>(French population)           | 72.5  | 26.5 | Capape and Reynaud 2011                                                    |
| Squalus cf. mitsukurii                             | 65.9  | 6.4  | Fischer et al. 2006*                                                       |
| Squalus japonicus                                  | 57.5  | 7.7  | Chen et al. 1981                                                           |
| Squalus montalbani                                 | 52.3  | 4.9  | Fitzpatrick J.L., Kempster R., Collin S.P.,<br>Evans J.P. unpublished data |

## References

- Bottaro, M., Ferrando, S., Gallus, L., Girosi, L. & Vacchi, M. (2008). First record of albinism in the deep-water shark *Dalatias licha*. *Marine Biodiversity Records* **1**, e10.
- Capapé C., & Reynaud C. (2011). Maturity, reproductive cycle and fecundity of the spiny dogfish *Squalus acanthias* (Chondrichthyes: Squalidae) off the Languedocian coast (southern France, northern Mediterranean). *Journal of the Marine Biological Association of the United Kingdom*. p.1
- Chatzisprou, A., & Megalofonou, P. (2005). Sexual maturity, fecundity and embryonic development of the spiny dogfish, *Squalus acanthias*, in the eastern Mediterranean Sea. *Journal of the Marine Biological Association of the United Kingdom* **85**, 1155-1161.
- Chen, C. T., Taniuchi, T., & Nose, Y. (1981). Some aspects of reproduction in pointed-snout dogfish, *Squalus japonicus*, taken off Nagasaki and Choshi. *Bulletin of the Japanese Society for the Science of Fish* **47**, 1157-1164.
- Coelho, R., & Erzini, K. (2007). Population parameters of the smooth lantern shark, *Etmopterus pusillus*, in southern Portugal (NE Atlantic). *Fisheries Research* **86**, 42–57.
- Fischer, A. F., Veras, D. P., Hazin, F. H. V., Broadhurst, M. K., Burgess, G. H., & Oliveira, P. G. V. (2006). Maturation of *Squalus mitsukurii* and *Cirrhigaleus asper* (Squalidae, Squaliformes) in the southwestern equatorial Atlantic Ocean. *Journal of Applied Ichthyology* **22**, 495-501.
- Fischer, A. F., Hazin, F. H. V., Carvalho, F., Viana, D. L., Rêgo, M. G., & Wor, C. (2009). Biological aspects of sharks caught off the Coast of Pernambuco, Northeast Brazil. *Brazilian Journal of Biology* **69**, 1173-1181.
- Flammang, B. E., Ebert, D. A., & Cailliet, G. M. (2008). Reproductive biology of deep-sea catsharks (Chondrichthyes: Scyliorhinidae) in the eastern North Pacific. *Environmental Biology of Fishes* **81**, 35-49.

Hazin, F., Fischer, A., & Broadhurst, M. (2001). Aspects of reproductive biology of the scalloped hammerhead shark, *Sphyrna lewini*, off northeastern Brazil. *Environmental Biology of Fishes* **61**, 151–159.

Horie, T., & Tanaka, S. (2000). Reproduction and food habits of two species of sawtail catsharks, *Galeus eastmani* and *G. nipponensis*, in Suruga Bay, Japan. *Fisheries Science* **66**, 812-825.

Joung, S. J., & Hsu, H. H. (2005). Reproduction and embryonic development of the shortfin mako, *Isurus oxyrinchus* Rafinesque, 1810, in the Northwestern Pacific. *Zoological Studies* **44**, 487-496.

Kousteni, V., M. Kontopoulou, and P. Megalofonou. 2010. Sexual maturity and fecundity of *Scyliorhinus canicula* (Linnaeus, 1758) in the Aegean Sea. *Marine Biology Research* **6**, 390-398.

Lucifora, L. O., Menni, R. C. & Escalante, A. H. (2002). Reproductive ecology and abundance of the sand tiger shark, *Carcharias taurus*, from the southwestern Atlantic. *ICES Journal of Marine Science* **59**, 553–561.

McClusky, L. M. (2011). Testicular degeneration during spermatogenesis in the blue shark, *Prionace glauca*: nonconformity with expression as seen in the diametric testes of other carcharhinids. *Journal of Morphology* **272**, 938-948.

Motta, F. S., Namora, R. C., Gadig, O. B. F., & Braga, F. M. S. 2007. Reproductive biology of the Brazilian sharpnose shark (*Rhizoprionodon lalandii*) from southeastern Brazil. *ICES Journal of Marine Science* **64**, 1829–1835.

Parsons, G. R. (1993). Geographic variation in reproduction between two populations of the bonnethead shark, *Sphyrna tiburo*. *Environmental Biology of Fishes* **38**, 25-35.

Parsons, G. R., & H. J. Grier. (1992). Seasonal changes in shark testicular structure and spermatogenesis. *Journal of Experimental Zoology* **261**, 173-184.

Stevens, J. D. & McLoughlin, J. (1991). Distribution, size and sex composition, reproductive biology and diet of sharks from Northern Australia. *Australian Journal of Marine and Freshwater Research* **42**, 151-199.

Sulikowski, J. A., Driggers, W. B., Ford, T. S., Boonstra, R. K., & Carlson, J. K. 2007. Reproductive cycle of the blacknose shark *Carcharhinus acronotus* in the Gulf of Mexico. *Journal of Fish Biology* **70**, 428–440.

Tanaka, S., Shiobara, Y., Hioki, S., Abe, H., Nishi, G., Yano, K. & Suzuki, K. (1990). The reproductive biology of the frilled shark, *Chlamydoselachus anguineus*, from Suruga Bay, Japan. *Japanese Journal of Ichthyology* **37**, 273–291.

Tanaka, S., Kitamura, T., Mochizuki, T., & Kofuji, K. (2011). Age, growth and genetic status of the white shark (*Carcharodon carcharias*) from Kashima-nada, Japan. *Marine and Freshwater Research* **62**, 548–556.

Taniuchi, T. (1988). Aspects of reproduction and food habits of the Japanese swellshark *Cephaloscyllium umbratile* from Choshi, Japan. *Bulletin of the Japanese Society of Scientific Fisheries* **54**, 627–633.

Yano, K. (1993). Reproductive biology of the slender smoothhound, *Gollum attenuatus*, collected from New Zealand waters. *Environmental Biology of Fishes* **38**, 59-71.

Zagaglia, C. R., Damiano, C., Hazin, F. H. V. & Broadhurst, M. K. (2011). Reproduction in *Mustelus canis* (Chondrichthyes: Triakidae) from an unexploited population off northern Brazil. *Journal of Applied Ichthyology* **27**, 25-29.
